# Supplementary material for: Disparate energy sources for slow and fast Dansgaard-Oeschger cycles
Source: Copernicus journal article supplement (doi:10.5194/cp-2023-6), 2023-02-24
Supplement: Supplementary file 1 [file cp-2023-6-supplement.pdf]

## **Supplementary Information to:**

### **Disparate energy sources for slow and fast Dansgaard-Oeschger cycles**

Diederik Liebrand<sup>1,\*</sup>, Anouk T. M. de Bakker<sup>2,\*</sup>, Heather. J. H. Johnstone<sup>3</sup> & Charlotte S. Miller<sup>3</sup>

5

This supplement contains three Supplementary Figures (Supp. Figs. S1 to S3), and one Supplementary Table (Supp. Table S1).

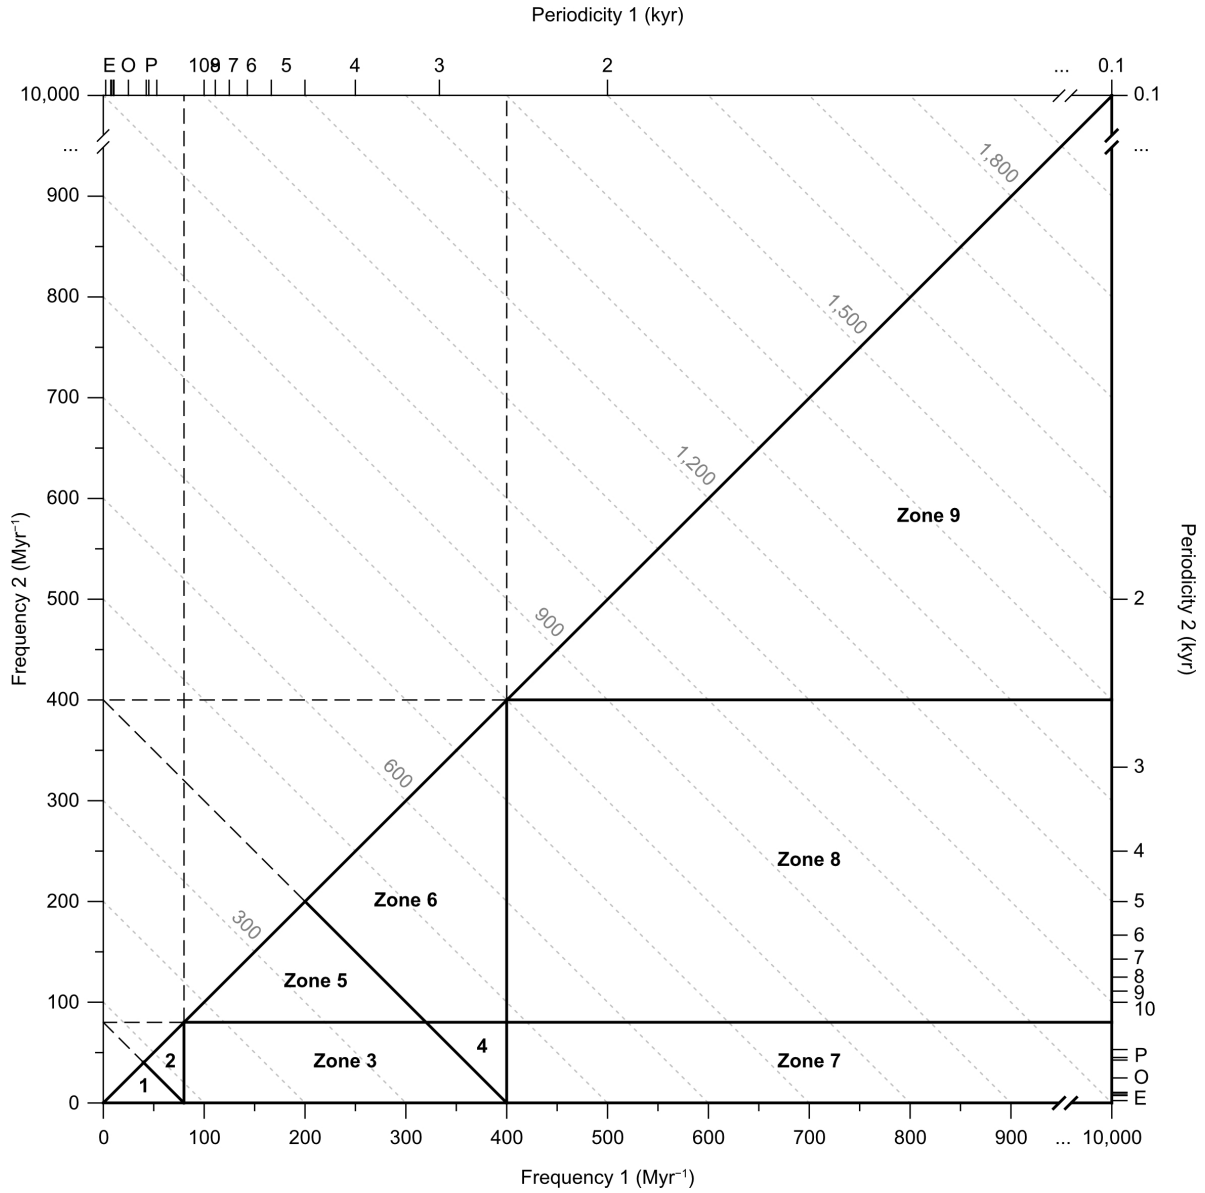

10

**Supp. Fig. S1: Bispectral zonation scheme.** Zone 1:  $B^{\text{lm}}(\text{A}, \text{A}, \text{A})$ , Zone 2:  $B^{\text{lm}}(\text{A}, \text{A}, \text{DOs})$ , Zone 3:  $B^{\text{lm}}(\text{DOs}, \text{A}, \text{DOs})$ , Zone 4:  $B^{\text{lm}}(\text{DOs}, \text{A}, \text{DOF})$ , Zone 5:  $B^{\text{lm}}(\text{DOs}, \text{DOs}, \text{DOs})$ , Zone 6:  $B^{\text{lm}}(\text{DOs}, \text{DOs}, \text{DOF})$ , Zone 7:  $B^{\text{lm}}(\text{DOF}, \text{A}, \text{DOF})$ , Zone 8:  $B^{\text{lm}}(\text{DOF}, \text{DOs}, \text{DOF})$ , and Zone 9:  $B^{\text{lm}}(\text{DOF}, \text{DOF}, \text{DOF})$ . “A” stands for astronomical periodicities, “DOs” stands for slow DO cycles, and “DOF” stands for fast DO cycles. The boundary between astronomical and slow DO cycles is set at  $f = 80 \text{ Myr}^{-1}$  (i.e.,  $p = 12.5 \text{ kyr}$ ), and between slow DO and fast DO cycles at  $f = 400 \text{ Myr}^{-1}$  (i.e.,  $p = 2.5 \text{ kyr}$ ). Frequency 3 (i.e.,  $f_3$ ) is represented as diagonal lines in the bispectrum on the linear-linear scale, and  $f_3$ ’s values can be read off by summing  $f_1$  and  $f_2$  at any point along a diagonal.

20

25

| Zone    | Difference Frequency 1        | Difference Frequency 2        | Sum Frequency 3               | Bispectral notation   |
|---------|-------------------------------|-------------------------------|-------------------------------|-----------------------|
| Zone 1  | Astronomical cycles           | Astronomical cycles           | Astronomical cycles           | $B(A, A, A)$          |
| Zone 2  | Astronomical cycles           | Astronomical cycles           | Slow DO cycles                | $B(A, A, DO_S)$       |
| No zone | Astronomical cycles           | Astronomical cycles           | Fast DO and centennial cycles | N/A                   |
| No zone | Slow DO cycles                | Astronomical cycles           | Astronomical cycles           | N/A                   |
| Zone 3  | Slow DO cycles                | Astronomical cycles           | Slow DO cycles                | $B(DO_S, A, DO_S)$    |
| Zone 4  | Slow DO cycles                | Astronomical cycles           | Fast DO and centennial cycles | $B(DO_S, A, DO_F)$    |
| No zone | Slow DO cycles                | Slow DO cycles                | Astronomical cycles           | N/A                   |
| Zone 5  | Slow DO cycles                | Slow DO cycles                | Slow DO cycles                | $B(DO_S, DO_S, DO_S)$ |
| Zone 6  | Slow DO cycles                | Slow DO cycles                | Fast DO and centennial cycles | $B(DO_S, DO_S, DO_F)$ |
| No zone | Fast DO and centennial cycles | Astronomical cycles           | Astronomical cycles           | N/A                   |
| No zone | Fast DO and centennial cycles | Astronomical cycles           | Slow DO cycles                | N/A                   |
| Zone 7  | Fast DO and centennial cycles | Astronomical cycles           | Fast DO and centennial cycles | $B(DO_F, A, DO_F)$    |
| No zone | Fast DO and centennial cycles | Slow DO cycles                | Astronomical cycles           | N/A                   |
| No zone | Fast DO and centennial cycles | Slow DO cycles                | Slow DO cycles                | N/A                   |
| Zone 8  | Fast DO and centennial cycles | Slow DO cycles                | Fast DO and centennial cycles | $B(DO_F, DO_S, DO_F)$ |
| No zone | Fast DO and centennial cycles | Fast DO and centennial cycles | Astronomical cycles           | N/A                   |
| No zone | Fast DO and centennial cycles | Fast DO and centennial cycles | Slow DO cycles                | N/A                   |
| Zone 9  | Fast DO and centennial cycles | Fast DO and centennial cycles | Fast DO and centennial cycles | $B(DO_F, DO_F, DO_F)$ |

30

**Supp. Table S1: Bispectral zones.** Zones correspond to Supp. Fig. S1. Certain combinations between the three periodicity bandwidths are listed, but do not occur in the bispectrum (marked by N/A). These interactions can be excluded as potential energy-transfer pathways.

35

40

45

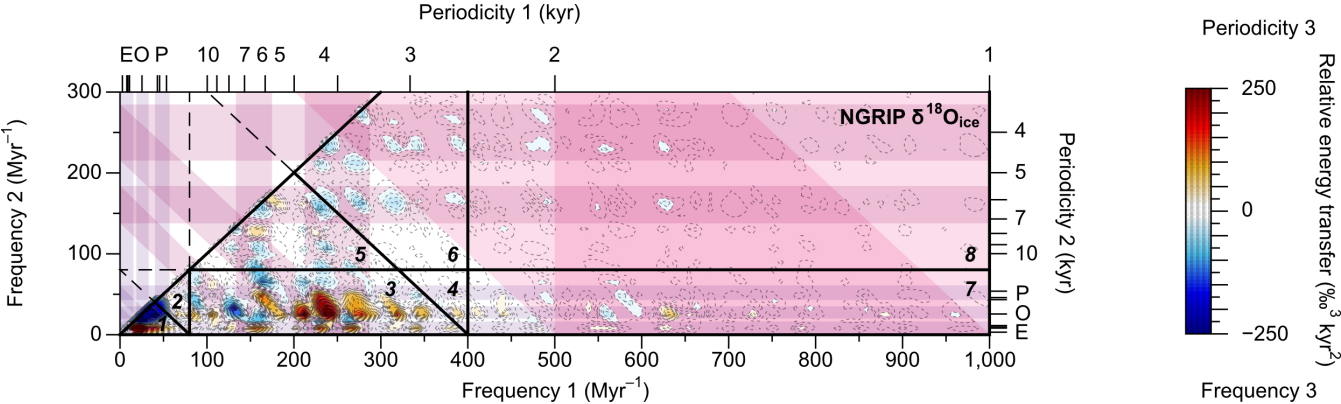

50

**Supp. Fig. S2: Bispectrum of the NGRIP  $\delta^{18}\text{O}_{\text{ice}}$  record.** The imaginary part of the bispectrum of the NGRIP  $\delta^{18}\text{O}_{\text{ice}}$  record. As in main Fig. 2, but here plotted on a linear-linear scale.

55

60

65

70

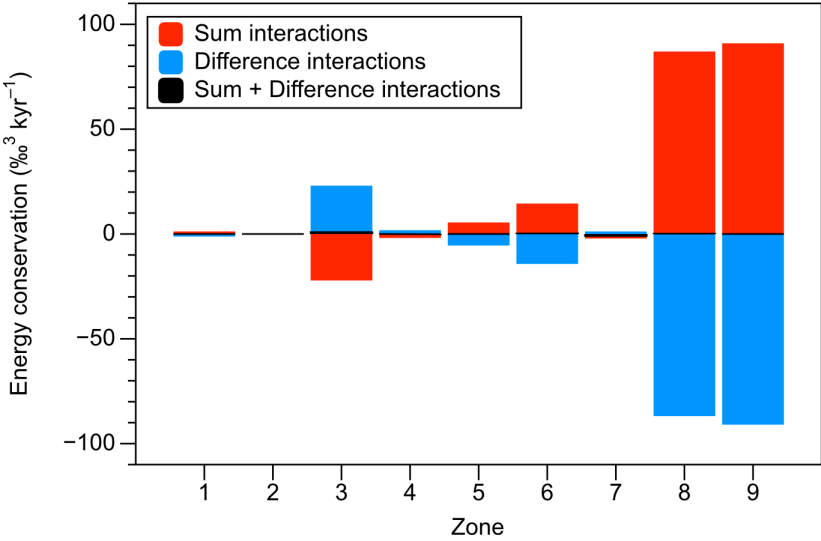

75

**Supp. Fig. S3: Conservativity.** Energy conservation (i.e., conservativity) of sum and difference interactions for each zone in the imaginary part of the bispectrum of the NGRIP  $\delta^{18}\text{O}_{\text{ice}}$  record.

80

85
